1 **Synthetic metabolic pathways for photobiological conversion of CO<sub>2</sub> into hydrocarbon**  
2 **fuel**

3

4 Ian Sofian Yunusa<sup>a</sup>, Julian Wichmann<sup>b</sup>, Robin Wördenweber<sup>b</sup>, Kyle J. Lauersen<sup>b</sup>, Olaf Kruse<sup>b</sup> and  
5 Patrik R. Jones<sup>a\*</sup>

6

7 <sup>a</sup>Department of Life Sciences, Imperial College London, SW7 2AZ London, UK

8 <sup>b</sup>Bielefeld University, Faculty of Biology, Center for Biotechnology (CeBiTec),

9 Universitätsstrasse 27, 33615, Bielefeld, Germany.

10 \*Corresponding author: p.jones@imperial.ac.uk

## 11 **ABSTRACT**

12 Liquid fuels sourced from fossil sources are the dominant energy form for mobile transport  
13 today. The consumption of fossil fuels is still increasing, resulting in a continued search for  
14 more sustainable methods to renew our supply of liquid fuel. Photosynthetic microorganisms  
15 naturally accumulate hydrocarbons that could serve as a replacement for fossil fuel, however  
16 productivities remain low. We report successful introduction of five synthetic metabolic  
17 pathways in two green cell factories, prokaryotic cyanobacteria and eukaryotic algae.  
18 Heterologous thioesterase expression enabled high-yield conversion of native acyl-ACP into  
19 free fatty acids (FFA) in *Synechocystis sp.* PCC 6803 but not in *Chlamydomonas reinhardtii*  
20 where the polar lipid fraction instead was enhanced. Despite no increase in measurable FFA  
21 in *Chlamydomonas*, genetic recoding and over-production of the native fatty acid  
22 photodecarboxylase (FAP) resulted in increased accumulation of 7-heptadecene.  
23 Implementation of a carboxylic acid reductase (CAR) and aldehyde deformylating oxygenase  
24 (ADO) dependent synthetic pathway in *Synechocystis* resulted in the accumulation of fatty  
25 alcohols and a decrease in the native saturated alkanes. In contrast, the replacement of CAR  
26 and ADO with *Pseudomonas mendocina* UndB (so named as it is responsible for 1-undecene  
27 biosynthesis in *Pseudomonas*) or *Chlorella variabilis* FAP resulted in high-yield conversion of  
28 thioesterase-liberated FFAs into corresponding alkenes and alkanes, respectively. At best, the  
29 engineering resulted in an increase in hydrocarbon accumulation of 8- (from 1 to 8.5 mg/g  
30 cell dry weight) and 19-fold (from 4 to 77 mg/g cell dry weight) for *Chlamydomonas* and  
31 *Synechocystis*, respectively. In conclusion, reconstitution of the eukaryotic algae pathway in  
32 the prokaryotic cyanobacteria host generated the most effective system, highlighting  
33 opportunities for mix-and-match synthetic metabolism. These studies describe functioning  
34 synthetic metabolic pathways for hydrocarbon fuel synthesis in photosynthetic  
35 microorganisms for the first time, moving us closer to the commercial implementation of  
36 photobiocatalytic systems that directly convert CO<sub>2</sub> into infrastructure-compatible fuels.

## 37 38 Keywords

39 Hydrocarbon fuel; Algae; Cyanobacteria; Alkanes; Alkenes; Fatty acids

## 40 41 Highlights

- 42 • Synthetic metabolic pathways for hydrocarbon fuels were engineered in algae
- 43 • Free fatty acids were effectively converted into alkenes and alkanes
- 44 • Transfer of algal pathway into cyanobacteria was the most effective

- 45      • Alkane yield was enhanced 19-fold in *Synechocystis* spp. PCC 6803
- 46      • Alkene yield was enhanced 8-fold in *Chlamydomonas reinhardtii*
- 47

## 48 INTRODUCTION

49 Cyanobacteria (prokaryotes) and algae (eukaryotes) are photosynthetic microorganisms that  
50 have evolved to naturally accumulate C15-C19 alkanes or alkenes at very low concentrations  
51 (0.02-1.12% alkane g/g cell dry weight (cdw)) (Lea-Smith et al., 2015; Schirmer et al., 2010;  
52 Sorigué et al., 2017) with the exception of naturally oleagineous species (Ajjawi et al., 2017;  
53 Metzger and Largeau, 2005; Peramuna et al., 2015). These hydrocarbons are postulated to  
54 influence the fluidity of cell membranes and are therefore essential for achieving optimal  
55 growth, indeed, the abolition of their biosynthetic capacities results in morphological defects  
56 (Lea-Smith et al., 2016). Only two enzymes, acyl-ACP reductase (AAR) and aldehyde  
57 deformylating oxygenase (ADO) are required to catalyze the bacterial conversion of acyl-ACP  
58 into alkanes (Schirmer et al., 2010). Similarly, eukaryotic microalgae also biosynthesize small  
59 quantities of alkanes and alkenes directly from fatty acids, employing the distinctly different  
60 and recently discovered fatty acid photodecarboxylase (FAP; (Sorigué et al., 2017)).

61 In order to engineer sustainable biotechnological systems for production of  
62 hydrocarbons for the fuel market, whether heterotrophic or light-driven, far greater yields are  
63 needed alongside other complementary non-biochemical improvements such as improved  
64 bio-process designs. Several studies have attempted to enhance alkane productivity in  
65 cyanobacteria by over-expression of the native or non-native AAR and ADO enzyme couple  
66 (Hu et al., 2013; Kageyama et al., 2015; Peramuna et al., 2015; Wang et al., 2013) which relies  
67 on acyl-ACP as the precursor. Although naturally accumulating alkane amounts have been  
68 enhanced through engineering and reported in high titres from the lipid-accumulating  
69 cyanobacteria, *Nostoc punctiforme* (up to 12.9% (g/g) cdw, (Peramuna et al., 2015)), similar  
70 efforts in the non-lipid accumulating model cyanobacterium *Synechocystis* sp. PCC 6803  
71 (hereafter *Synechocystis* 6803) have at best yielded only 1.1% (g/g) cdw (Hu et al., 2013;  
72 Wang et al., 2013). In eukaryotic algae, the native alkene/alkane pathway was only recently  
73 discovered and there has been no work so far to engineer the specific pathways that  
74 synthesize such hydrocarbons. Some species of algae are also known to naturally accumulate  
75 hydrocarbons that could serve as a fuel following chemical conversion. For example, certain  
76 races of the green alga *Botrococcus braunii* naturally secrete long-chain terpene hydrocarbons  
77 as a significant portion of their biomass (Eroglu and Melis, 2010; Metzger and Largeau, 2005).  
78 However, their use as a fuel source is made impossible by the incredibly slow growth rates of  
79 this alga (Cook et al., 2017). Other oleaginous algal species can accumulate a significant  
80 portion of their biomass as triacylglycerol compounds, generally under nitrogen stress.  
81 Indeed, this phenomenon drove the push for the use of algae as third generation biofuel

82 feedstock in the first place. However, process design and downstream processing cost  
83 considerations of large-scale algal cultivation have hindered the common adoption of algal  
84 oils for transportation fuels (Quinn and Davis, 2015). Triacylglycerol stored by eukaryotic  
85 algae can also be turned into transportation fuels via transesterification to liberate the  
86 alkanes and alkenes from the glycerol backbone. An attractive alternative to the above  
87 concepts is instead to directly secrete ready-to-use hydrocarbon products from algal cells as  
88 this would overcome issues with biomass harvesting and chemical processing and thereby  
89 greatly reduce process costs (Delrue et al., 2013).

90 In order to achieve such a one-step conversion of CO<sub>2</sub> into ready infrastructure-  
91 compatible hydrocarbons with photosynthetic hosts, however, genetic reprogramming  
92 becomes essential for introduction of synthetic metabolic pathways and optimization of the  
93 entire system. Several enzymes have recently been reported to enable biosynthesis of fatty  
94 aldehyde precursors (Akhtar et al., 2013), fatty alkanes (Bernard et al., 2012; Qiu et al., 2012),  
95 and fatty alkenes (Rude et al., 2011; Rui et al., 2015; Rui et al., 2014). Combinatorial assembly  
96 of such key enzymes into synthetic metabolic pathways consequently enabled a number of  
97 novel opportunities for hydrocarbon biosynthesis, as described by many including (Akhtar et  
98 al., 2013; Kallio et al., 2014; Sheppard et al., 2016; Zhu et al., 2017). Although such studies  
99 have so far only been reported using heterotrophic microorganisms (*Escherichia coli* and  
100 *Saccharomyces cerevisiae*) there are no reports of similar work in any phototrophic  
101 microorganism.

102 In this study, we describe a first and systematic study to implement synthetic  
103 metabolic pathways for the biosynthesis of hydrocarbon fuel in both prokaryotic and  
104 eukaryotic photosynthetic microorganisms using the model strains *Synechocystis* 6803 and  
105 *Chlamydomonas reinhardtii*. Several synthetic pathways towards saturated and unsaturated  
106 hydrocarbons were functionally demonstrated in *Synechocystis* 6803, increasing the  
107 hydrocarbon content up to 19-fold, and engineered *Chlamydomonas* accumulated 8-fold more  
108 alkenes than the wild-type. Interestingly, the "best" system was achieved by transferring a  
109 reconstructed pathway from eukaryotic algae into the prokaryotic cyanobacterium.

## 110 MATERIALS AND METHODS

111

### 112 ***2.1 Growth conditions, genetic constructs, transformation and screening of Escherichia*** 113 ***coli and Synechocystis sp. PCC 6803***

114

115 *Escherichia coli* DH5 $\alpha$  was used to propagate all the plasmids used in this study. Strains were  
116 cultivated in lysogeny broth (LB) medium (LB Broth, Sigma Aldrich), 37 °C, 180 rpm, and  
117 supplemented with appropriate antibiotics (final concentration: carbenicillin 100  $\mu\text{g/ml}$ ,  
118 chloramphenicol 37  $\mu\text{g/ml}$ , kanamycin 50  $\mu\text{g/ml}$ , gentamicin 10  $\mu\text{g/ml}$ , and erythromycin 200  
119  $\mu\text{g/ml}$ ).

120 *Synechocystis sp.* PCC 6803, obtained from Prof. Klaas Hellingwerf (University of  
121 Amsterdam, Netherlands), was cultivated in BG11 medium without cobalt ((hereafter BG11-  
122 Co), as the metal was used as an inducer in most cultures. All media contained appropriate  
123 antibiotic(s) (final concentration: kanamycin 50  $\mu\text{g/ml}$ , gentamicin 50  $\mu\text{g/ml}$ , and  
124 erythromycin 20  $\mu\text{g/ml}$ ). Gentamicin was only used for selection on agar plates. Precultures  
125 inoculated from colonies on agar plates were grown in 6-well plates (5 ml). When the OD<sub>730</sub>  
126 reached 3-4, the culture was transferred to a 100-ml Erlenmeyer flask and the OD<sub>730</sub> was  
127 adjusted to 0.2 by adding BG11-Co medium to a final volume of 25 ml containing appropriate  
128 antibiotic(s). The cultivation was carried out for 10 days at 30 °C with continuous illumination  
129 at 60  $\mu\text{mol photons m}^{-2} \text{s}^{-1}$  and 1% (v/v) CO<sub>2</sub>. Each main treatment culture was induced on  
130 day 2 and samples were taken for measurement of OD<sub>730</sub> and metabolites day 6 and 10. All  
131 cultivations were carried out in an AlgaeTron230 (Photon Systems Instruments) (PSI) at  
132 30 °C with continuous illumination at 60  $\mu\text{mol photons m}^{-2} \text{s}^{-1}$  and 1% (v/v) CO<sub>2</sub>, except  
133 where noted (100-300  $\mu\text{mol photons m}^{-2} \text{s}^{-1}$ ). A representative growth curve and all final  
134 OD<sub>730</sub> values are shown in Supplementary Figure 1.

135 All plasmids (Supplementary Table 1A) used for transformation of cyanobacteria were  
136 assembled using the BASIC Assembly method (Storch et al., 2015). Linkers were designed  
137 using the R2ODNA software: <http://www.r2odna.com/> and obtained from Integrated DNA  
138 Technologies Incorporated. The details of all linkers, primers and DNA parts used to construct  
139 each plasmid are given in Supplementary Tables 1B, 1C and 1D.

140 For transformation by natural assimilation, each *Synechocystis sp.* PCC 6803 strain was  
141 inoculated from freshly prepared colonies on agar plates into 25 ml BG11-Co with a starting  
142 OD 0.02. The cells were harvested when the OD<sub>730</sub> reached 0.4-0.7, washed in 10 ml BG11-Co  
143 twice, and resuspended in 500  $\mu\text{L}$  BG11-Co. One hundred microliters of concentrated liquid

144 culture were mixed with four to seven micrograms of plasmid and incubated at 30°C with  
145 continuous illumination at 60  $\mu\text{mol photons m}^{-2} \text{s}^{-1}$  and 1% (v/v) CO<sub>2</sub> for 12-16 h prior to  
146 plating on BG11-Co agar containing 10% strength of antibiotic. To promote segregation,  
147 individual colonies were restreaked on BG11-Co agar with higher antibiotic concentration. To  
148 check the segregation, the biomass was resuspended in nuclease free water and exposed to  
149 two freeze-thaw cycles (95°C, -80°C). Following centrifugation, 3  $\mu\text{L}$  was used as a template  
150 for a diagnostic polymerase chain reaction (PCR). Primers used for each PCR are listed in  
151 Supplementary Table 1C. Only fully segregated mutants were used in further experiments. All  
152 cyanobacteria strains used in the study are listed in Supplementary Table 2.

153 For transformation by triparental conjugation, one hundred microliters of the cargo  
154 strain (*E. coli* HB101 (already carrying the pRL623 plasmid)), conjugate strain (ED8654 (Elhai  
155 and Wolk, 1988)), and *Synechocystis* sp. PCC 6803 (OD<sub>730</sub> ~1) were mixed and incubated for 2  
156 h (30 °C, 60  $\mu\text{mol photons m}^{-2} \text{s}^{-1}$ ). Prior to mixing, all the *E. coli* and cyanobacteria strains  
157 were washed with fresh LB and BG11-Co medium, respectively, to remove the antibiotics.  
158 After 2 h of incubation, the culture mix was transferred onto BG11 agar plates without  
159 antibiotic and incubated for 2 d (30 °C, 60  $\mu\text{mol photons m}^{-2} \text{s}^{-1}$ ). After 2 d of incubation, cells  
160 were scraped from the agar plate, resuspended in 500  $\mu\text{L}$  of BG11-Co medium, and  
161 transferred onto a new agar plate containing 20  $\mu\text{g/ml}$  erythromycin. Cells were allowed to  
162 grow for one week until colonies appeared. Individual colonies were restreaked onto a new  
163 plate containing 20  $\mu\text{g/ml}$  erythromycin and used for subsequent experiments.

164

## 165 **2.2 Growth conditions, genetic constructs, transformation and screening of**

### 166 ***Chlamydomonas reinhardtii***

167 *C. reinhardtii* strain UVM4 was used in this work (Neupert et al., 2009) graciously provided by  
168 Prof. Dr. Ralph Bock)). The strain was routinely maintained on Tris acetate phosphate (TAP)  
169 medium (Gorman and Levine, 1965) either with 1.5% agar plates or in liquid with 250  $\mu\text{mol}$   
170  $\text{photons m}^{-2} \text{s}^{-2}$ . Transformation was conducted with glass bead agitation as previously  
171 described (Kindle, 1990). The amino acid sequences of *C. reinhardtii* native fatty acid  
172 photodecarboxylase (FAP) (Uniprot: A8JHB7; (Sorigué et al., 2017)), *E. coli* thioesterase A  
173 (TesA: P0ADA1), *Jeotgalicoccus* sp. ATCC 8456 terminal olefin-forming fatty acid  
174 decarboxylase (OleTJE) (E9NSU2), and *Rhodococcus* sp. NCIMB 9784 P450 reductase RhFRED  
175 (Q8KU27) were codon optimized and copies of the intron 1 of ribulose biphosphate  
176 carboxylase small subunit 2 (RBCS2) were added throughout the coding sequences as  
177 previously described (Baier et al., 2018). The nucleotide sequences of optimized intron

178 containing genes have been submitted to NCBI, accession numbers can be found in  
179 Supplementary Table 3. All synthetic genes were chemically synthesized (GeneArt) and  
180 cloned between *Bam*HI-*Bgl*III in the pOpt2\_PsaD\_mVenus\_Paro or pOpt2\_PsaD\_mRuby2\_Ble  
181 vectors (Wichmann et al., 2018). PsaD represents the 36 amino acid photosystem I reaction  
182 center subunit II (PsaD) chloroplast targeting peptide (CTP) (Lauersen et al., 2015) between  
183 *Nde*I-*Bam*HI restriction sites of the pOpt2 vectors (Wichmann et al., 2018). The native FAP  
184 enzyme was designed to contain an additional glycine codon at aa position 33 to allow the  
185 insertion of a *Bam*HI site at the border of the predicted CTP. The whole synthetic enzyme  
186 including native targeting peptide was cloned *Nde*I-*Bgl*III and a version was created with the  
187 PsaD CTP built by cloning *Bam*HI-*Bgl*III into the vectors described above. Fusions of different  
188 sequences were made by digestion and complementary overhang annealing of the *Bam*HI-  
189 *Bgl*III mediated restriction sites for each respective construct as needed to obtain the fusions  
190 used in the present work (Supplementary Figure 2). After transformation, expression was  
191 confirmed by fluorescence microscopy screening for mVenus (YFP) or mRuby2 (RFP)  
192 reporters as previously described (Lauersen et al., 2016; Wichmann et al., 2018). Individual  
193 mutants were subjected to Western blotting and immuno detection to determine whether  
194 full-length protein products were formed (anti-GFP polyclonal HRP linked antibody, Thermo  
195 Fisher Scientific). Wide-field fluorescence microscopy was used to confirm chloroplast  
196 localization of YFP-linked constructs as previously described (Lauersen et al., 2016).

197

### 198 **2.3 Product analysis**

199 Three different extraction and analysis protocols were used for the analysis of (1) acids, (2)  
200 alcohols and (3) alkanes as well as alkenes from cyanobacteria cultures. For each analyte  
201 group, liquid cultures in flasks were mixed well by shaking prior to transferring 2 mL of liquid  
202 culture into a PYREX round bottom threaded culture tube (Corning, Manufacturer Part  
203 Number: 99449-13).

204 For fatty acid analysis, free fatty acid extraction was performed as described  
205 previously (Liu et al., 2011; Yunus and Jones, 2018). In brief, two hundred microliters of 1 M  
206 H<sub>3</sub>PO<sub>4</sub> were added to acidify each 2 mL culture and spiked with 100 µg pentadecanoic acid  
207 (Sigma Aldrich) as an internal standard. Four millilitres of n-hexane (VWR Chemicals) was  
208 added and the mixture vortexed vigorously prior to centrifugation at 3500 x g for 3 min. The  
209 upper hexane layer was then transferred to a fresh PYREX round bottom threaded culture  
210 tube and evaporated completely under a stream of nitrogen gas. Five hundred microliters of  
211 1.25 M HCl in methanolic solution were added to methyl esterify the free fatty acid at 85 °C for



212 2 h. Samples were cooled to room temperature and 500  $\mu$ L of hexane was added for  
213 extraction of the fatty acid methyl esters (FAMES).

214 For fatty alcohol, alkane and alkene analysis, extraction was done as described  
215 previously (Zhou et al., 2016) with modification. Briefly, 2 mL of liquid culture were spiked  
216 with 50  $\mu$ g 1-nonanol, 100  $\mu$ g octadecane, and 100  $\mu$ g 1-pentadecanol and mixed with 4 mL of  
217 chloroform:methanol (2:1 v/v) solution. The mixture was vortexed vigorously and  
218 centrifuged at 3500 x g for 3 min. The lower organic phase was then transferred into a new  
219 glass tube and extraction was repeated one more time. The lower organic phase was  
220 combined and dried under a stream of nitrogen gas. For fatty alcohol derivatisation, the dried  
221 extract was resuspended in 100  $\mu$ L chloroform, mixed with 100  $\mu$ L of N, O-  
222 bistrifluoroacetamide (BSTFA) (TCI Chemicals) and transferred to an insert in a GC vial that  
223 was incubated at 60 °C for 1 h prior to GC analysis. Note that no derivatisation was needed for  
224 the analysis of hydrocarbons.

225 Samples (1  $\mu$ L) were analysed using an Agilent Technologies (Santa Clara, CA, USA)  
226 7890B Series Gas Chromatograph (GC) equipped with an HP-5MS column (pulsed split ratio  
227 10:1 and split flow 10 ml/min), a 5988B Mass Spectrophotometer (MS) and a 7693  
228 Autosampler. For the acids the GC oven program followed an initial hold at 40 °C for 3 min, a  
229 ramp at 10 °C.min<sup>-1</sup> to 150 °C, a second ramp at 3 °C.min<sup>-1</sup> to 270 °C, a third ramp at 30 °C.min<sup>-1</sup>  
230 to 300 °C, and a final hold for 5 min. For alcohols and alkenes, there was an initial hold at 40  
231 °C for 0.5 min, a ramp at 10 °C.min<sup>-1</sup> to 300 °C, and a final hold for 4 min. For alkanes, the oven  
232 was initially held at 70 °C for 0.5 min, a ramp at 30 °C.min<sup>-1</sup> to 250 °C, a second ramp at 40  
233 °C.min<sup>-1</sup> to 300 °C, and a final hold for 2 min. The acids, alkanes and alcohols were quantified  
234 by comparing the peak areas with that of the internal standards: pentadecanoate (for all  
235 acids), octadecane (for all alkanes), 1-nonanol (for C8 to C12 alcohols) and 1-pentadecanol  
236 (for C14 alcohols and above). The quantity of the main products (C15 and C17 alkanes, C15  
237 alkene, and C12, C14, C16, and C18 alcohols and acids) were also corrected with their  
238 respective mass spectrometer response factors obtained using dilution series of commercial  
239 standards.

240 Gas chromatography mass spectroscopy (GC-MS) aimed at identification of  
241 hydrocarbon products from *C. reinhardtii* was conducted with solvent extracted samples  
242 following previously described protocols and internal standards (Lauersen et al., 2016).  
243 Quantification of 7-heptadecene was performed with serial dilutions (1 to 900  $\mu$ M) of  
244 commercial 1-heptadecene standard (Acros Organics) in dodecane using extracted ion  
245 chromatograms with masses 55.00, 69.00, 91.00, 93.00, 83.00, 97.00, and 111.00.

## 246 RESULTS AND DISCUSSION

247

248 Several synthetic pathway designs were considered, all commencing with the liberation of  
249 “free” fatty acids from the native fatty acid biosynthesis pathway (Fig. 1), the presumed native  
250 precursor for many of the decarboxylating enzymes evaluated in this study.

251

### 252 ***3.1 Over-production of free fatty acids as precursor for hydrocarbon biosynthesis -*** 253 ***Expression of Escherichia thioesterase deregulates lipid membrane biosynthesis in*** 254 ***Chlamydomonas***

255

256 In order to liberate FFAs in cyanobacteria we over-expressed the *E. coli* C16-C18 specific  
257 thioesterase TesA (Cho and Cronan, 1995) lacking its native signal sequence peptide ('TesA)  
258 and deleted the gene encoding the native fatty acyl ACP synthase (*aas*) (Kaczmarzyk et al.,  
259 2010; Liu et al., 2011)(Fig. 1). The native signal sequence peptide directs TesA to the  
260 periplasm in *E. coli* (Cho et al 1993) and its removal is assumed to maximize the liberation of  
261 "free" fatty acids also in cyanobacteria by retaining the enzyme in the cytosol. Such  
262 'TesA/ $\Delta$ *aas* engineering has previously been reported several times before in cyanobacteria  
263 (Liu et al., 2011, Ruffing et al., 2014; Work et al., 2015; Kato et al., 2017), with 13% (g/g cell  
264 dry weight (CDW)) as the highest reported fatty acid yield in *Synechocystis* 6803 (Liu et al  
265 2011). Further potentially stackable modifications to the strain or process have also been  
266 reported. For example, by employing a solvent overlay, Kato et al., 2017 reported up to 36%  
267 (g/g) cdw of fatty acids excreted into the media using 'TesA/ $\Delta$ *aas* *Synechococcus elongatus* sp.  
268 PCC 7942. In the present study, the chromosomal integration of '*tesA* into the *psbA2* site  
269 (*slr1311*) of *Synechocystis* 6803  $\Delta$ *aas* ( $\Delta$ *aas*-'TesA), under the control of the light-inducible  
270 promoter PpsbA2S, resulted in the excretion of of C14:0 (3.5 mg/g CDW), C16:0 (23.2 mg/g  
271 CDW) and C18:0 (5.7 mg/g CDW) fatty acids with a chain-length distribution that is in  
272 agreement with previously reported findings (Liu2011) (Fig. 2A; Supplementary Fig. 3).

273 Overproduction of the same thioesterase ('TesA) and targeting of the enzyme product  
274 to the chloroplast was possible in *C. reinhardtii*. The synthetic algal optimized *E. coli* '*tesA* gene  
275 was fused with an N-terminal PsaD-based chloroplast targeting peptide and a C-terminal  
276 yellow fluorescent protein (YFP) encoding gene. Both the coding genes were interspersed by  
277 synthetic introns (Fig. 2B) as previously described to enhance transgene expression from the  
278 nuclear genome (Baier et al., 2018). Fluorescence microscopy indicated correct localization of  
279 the 'TesA fluorescent protein fusion to the algal chloroplast (Fig. 2C). Although no FFA could

280 be detected in the culture medium, a difference was observed in the lipid profile of the green  
281 algal cells, suggesting a de-regulation of fatty acid synthesis that specifically affected the polar  
282 lipid fraction of the alga. This was indicated by an over-accumulation of C18:1n9c chain  
283 lengths in the polar lipid membranes, with subtle changes observed in other acyl-ACP species  
284 such as C14:0 (Fig. 2D; Supplementary Fig. 4). Thus, 'TesA\_YFP clearly had an impact on lipid  
285 metabolism in the eukaryotic algal host, but, the capture of liberated FFA by acyl-ACP or -CoA  
286 synthases is likely too effective, thereby limiting the application of the same engineering  
287 principles carried out for cyanobacteria. An annotated gene product in *Chlamydomonas*  
288 Cre06.g299800 (Phytozome v5.5) has some sequence similarity to *Synechocystis aas* and  
289 therefore represents an interesting target for future strategies to block native re-uptake of  
290 FFA in the green algal cell.

291 Having achieved strains with enhanced accumulation of FFA in *Synechocystis*, or at  
292 least a perturbation to the lipid biosynthetic system in *Chlamydomonas*, we proceeded to  
293 investigate enzymes that further convert FFAs into hydrocarbon end-products.

### 294 295 **3.2 Effective conversion of free fatty acids into alkenes using UndB**

296 Three different enzymes that catalyze the conversion of fatty acids into alkenes have been  
297 recently reported, OleT (Rude et al., 2011), UndA (Rui et al., 2014), and UndB (Rui et al., 2015)  
298 (Fig. 1). So far, the best reported productivity in both *E. coli* (Rui et al., 2015) and *S. cerevisiae*  
299 (Zhou et al., 2018) has been with UndB.

300 In *Synechocystis* 6803, we transformed the  $\Delta aas$ -'TesA strain with an RSF1010-based  
301 plasmid harboring a codon-optimized *undB* under the control of the P<sub>lac143</sub> promoter  
302 (Markeley et al., 2014), thereby generating the strain  $\Delta aas$ -'TesA-1010-UndB (Fig. 3A). After  
303 10 days of cultivation, both the free fatty acids and alkanes were extracted and analyzed as  
304 described in the Materials and Methods section. The accumulation of free fatty acids was  
305 markedly reduced in the  $\Delta aas$ -'TesA-1010-UndB strain (Fig. 3B, 3C). In its place, both 1-  
306 pentadecene and 1-heptadecene accumulated with a molar yield suggesting approximately  
307 55% conversion of 'TesA-liberated FFAs (compare Fig. 3C with Fig. 3D). More than >84% of  
308 the FFAs disappeared relative to the  $\Delta aas$ -'TesA strain suggesting that UndB was catalytically  
309 efficient *in vivo* and that the electrons required in the UndB reaction were fortunately  
310 supplied by an unknown source. The  $\Delta aas$ -'TesA-1010-UndB strain displayed a lower biomass  
311 accumulation than the controls ( $\Delta aas$ -empty and  $\Delta aas$ -'TesA strains) (Supplementary Fig. 1),  
312 presumably due to product toxicity imparted by the alkenes. A direct comparison with the  
313 conversion efficiency in *E. coli* is not possible since the FFA conversion efficiency was not

314 reported in the original work (Rui et al., 2015). Despite the disappearance of C14:0 fatty acids  
315 in the  $\Delta$ as-'TesA-1010-UndB strain, no measurable 1-tridecene (the expected corresponding  
316 alkene) was observed in the whole culture extracts (Fig. 3C). None of the observed alkene  
317 products were secreted extracellularly (Fig. 3E).

318 In *Chlamydomonas*, we attempted to over-produce the *Jeotgalicoccus* sp. terminal  
319 olefin-forming fatty acid decarboxylase (OleTJE) and the *Rhodococcus* sp. P450 reductase  
320 (RhFRED). OleTJE was chosen as it could theoretically produce C17:1 and C15:0 hydrocarbons  
321 from the major lipid species of the green algal cell, C18:1 and C16:0, respectively (Fig. 1).  
322 Fusion to RhFRED has been reported to enable hydrogen peroxide-independent  
323 decarboxylase activity (Liu et al., 2014). The protein products of this decarboxylase and its  
324 fusion in either orientation to RhFRED could be detected by Western blotting and located to  
325 the algal chloroplast in fluorescence microscopy (Supplementary Figure 5). However, no  
326 differences in GC-MS profiles between the parental and expression strains could be found in  
327 either dodecane solvent overlays or cell-pellet solvent extracts.

328

### 329 ***3.3 Transfer of the CAR/ADO based pathway from E. coli to Synechocystis 6803 resulted in*** 330 ***the accumulation of fatty alcohols and a reduction in alkane accumulation***

331 Carboxylic acid reductases (CAR) have been previously used to construct a number of  
332 synthetic pathways for alkane biosynthesis in heterotrophic microorganisms (Akhtar et al.,  
333 2013; Kallio et al., 2014; Sheppard et al., 2016; Zhu et al., 2016). Although CAR appears to  
334 have a high capability for converting fatty acids into corresponding fatty aldehydes (Akhtar et  
335 al., 2013) (Fig. 1), a bottleneck in previous heterotrophic pathways is the subsequent  
336 conversion into alkanes by kinetically slow ADO enzymes and competition with native  
337 aldehyde reductases that more effectively convert aldehydes into alcohols (Kallio et al., 2014;  
338 Sheppard et al., 2016).

339 Since *Synechocystis* 6803 natively harbors an aldehyde deformylating oxygenase (ADO)  
340 with the appropriate substrate specificity (Khara et al., 2013) (Fig. 1), we first combined TesA  
341 with CAR and evaluated its ability to supply the native ADO. A synthetic operon expressing all  
342 required parts (including the CAR maturation protein Sfp) was introduced to the RSF1010  
343 plasmid backbone (Fig. 4A) and used to transform *Synechocystis* 6803  $\Delta$ as, thus creating the  
344 strain  $\Delta$ as-1010-TPC2. This strain accumulated both fatty acids (Fig. 4B and 4D) and fatty  
345 alcohols (Fig. 4C and 4E). The quantity of heptadecane was reduced in  $\Delta$ as-1010-TPC2  
346 relative to  $\Delta$ as-1010-'TesA (Fig. 4F). This suggests that the introduced CAR-based pathway  
347 had not managed to increase the supply of fatty aldehydes to the native ADO. CAR and native

348 aldehyde reductase(s) had instead very effectively converted >90% of the FFA pool (Fig. 4D)  
349 into corresponding alcohols (Fig. 4E). The most likely reason for the increase in FFA in latter  
350 experiments is due to increased expression of *TesA* using the RSF1010 plasmid in  $\Delta aas-1010-$   
351 *TesA* (Fig. 4D), relative to the amount of *TesA* when expressed from the chromosomal  
352 location in  $\Delta aas-TesA$  (Fig. 3C). Similar observations have also been previously reported by  
353 Angermayr et al. (Angermayr et al., 2014). The different promoters used in the two strains are  
354 also likely to have influenced the outcome, however, we are not aware of any studies that  
355 directly compare the two promoters head-to-head.

356 Substantial quantities of fatty alcohols did accumulate in the  $\Delta aas-1010-TPC2$  strain,  
357 suggesting that the supply of fatty aldehydes is not the limiting factor. One possibility is that  
358 the native aldehyde reductases are simply much more active than the native ADO (Eser et al.,  
359 2011; Lin et al., 2013). Another possibility is that native ADO and AAR form a close metabolon  
360 *in vivo* (Warui et al., 2015) that locks out access to ADO from external supplies of fatty  
361 aldehydes. In order to test this possibility, we attempted to create a variant of  $\Delta aas-1010-$   
362 TPC2 that also included chromosomal ADO over-expression cassette under the PpsbA2S  
363 promoter. Despite numerous transformation and segregation attempts, however, we were  
364 unable to isolate any stable segregants. Another complementary strategy that could be  
365 considered in future work would be to eliminate native aldehyde reductases, as previously  
366 carried out in earlier *E. coli* studies (Kallio et al., 2014; Sheppard et al., 2016), although the full  
367 complement of fatty aldehyde reductase encoding genes in cyanobacteria remains unknown.  
368 Given the lack of success in producing alkanes with the CAR/ADO route in cyanobacteria we  
369 then considered alternative options for both cyanobacteria and algae.

370

### 371 ***3.4 Engineering of the native eukaryotic algae pathway and transfer to cyanobacteria***

#### 372 ***results in enhanced conversion of CO<sub>2</sub> into alkanes***

373 A fatty acid photodecarboxylase (FAP) that directly converts saturated and unsaturated FFAs  
374 into alkanes and alkenes, respectively, was recently discovered in eukaryotic algae (Sorigué et  
375 al., 2017). In *Chlamydomonas*, the source of free fatty acids for the native alkene pathway  
376 remains unknown, although the degradation of membrane lipids may release some FFA  
377 (illustrated in Fig. 1). However, we would expect increased accumulation of alkanes in algae if  
378 we were able to increase the cellular quantity of the native FAP and/or introduce synthetic  
379 routes to the FFA precursors.

380 Accordingly, we overproduced native FAP from *C. reinhardtii* (CrFAP) on its own or in  
381 combination with co-production of *E. coli* *TesA*. The over-expression of CrFAP was carried

382 out either with its native chloroplast targeting peptide (CTP) or the robust PsaD CTP which  
383 has been previously used to mediate chloroplast localization of numerous reporters  
384 (Lauersen et al., 2015; Lauersen et al., 2018; Rasala et al., 2013). In order to minimize any  
385 native regulation of the genomic sequence, the gene was subjected to a strategy of gene design  
386 which has recently been shown to enable robust transgene expression from the nuclear  
387 genome of this alga (Baier et al., 2018). Briefly, the sequence was codon optimized based on  
388 its amino acid sequence and multiple copies of the first intron of the *C. reinhardtii* ribulose-  
389 1,5-bisphosphate carboxylase/oxygenase (RuBisCo) small subunit 2 (rbcS2i1,  
390 NCBI: X04472.1) were spread throughout the coding sequence *in silico*. This nucleotide  
391 sequence was chemically synthesized and used for expression from the algal nuclear genome.  
392 This strategy has previously enabled heterologous overproduction of non-native  
393 sesquiterpene synthases (Lauersen et al., 2016; Lauersen et al., 2018; Wichmann et al., 2018),  
394 and in the present study also the 'TesA, OleTJE, and RhFRED proteins. However, complete  
395 codon optimization and synthetic intron spreading of a native gene has not yet been  
396 demonstrated in eukaryotic algae. Both constructs mediated full-length target protein  
397 production which was detectible in Western blots (Supplementary Fig. 5B). Replacing the  
398 native CTP with the PsaD CTP enabled more reliable and robust accumulation, which was  
399 detectible as YFP signal in the algal chloroplast (Supplementary Fig. 6) and strong bands in  
400 transformants expressing this construct in Western blots (Supplementary Fig. 5B). The  
401 parental UVM4 strain was found to contain ~0.5 mg/g 7-heptadecene as a natural product  
402 (Supplementary Fig. 7). Transformants generated with the CrFAP construct (Cr8) were found  
403 to contain up to 8x more of this alkene compared to the empty vector (Cr2) control strain (up  
404 to  $8.5 \pm 1.5$  mg/g, Fig. 5) which was found almost exclusively within the biomass  
405 (Supplementary Fig. 7). The product was not detected in dodecane solvent overlays. CrFAP  
406 accepts a very specific substrate (*cis*-vaccenic acid, C18:1*cis*Δ11) *in vivo* (Sorigué et al., 2017),  
407 which corresponds to the accumulation of only 7-heptadecene as the only detected increased  
408 product. This substrate is an unusual FA, and is likely not naturally abundant in the algal cell.  
409 Notably, any attempts to increase the availability of free fatty acids using *E. coli* 'TesA did not  
410 result in any increase in the quantity or diversity of accumulated alkanes. Future enzyme  
411 engineering will likely be able to overcome this substrate specificity and increase overall  
412 yields of liberated hydrocarbons. However, a strategy which would allow secretion of these  
413 molecules, similar to the capture of heterologous terpenoids in dodecane solvent overlay  
414 (Lauersen et al., 2016; Lauersen et al., 2018; Wichmann et al., 2018), would be an attractive  
415 next target in order to enable photo-biocatalysis of hydrocarbons from the algal biomass.

416           Given the success with the FAP pathway in *Chlamydomonas* (present study) and earlier  
417 work in *E. coli* (Sorigué et al., 2017), as well as finding that 'TesA expression can substantially  
418 enhance the FFA pool in cyanobacteria, a synthetic FAP pathway was an obvious choice to  
419 consider also for the prokaryotic host. We therefore proceeded to implement a reconstituted  
420 variant of the eukaryotic algae pathway in cyanobacteria by combining TesA with FAP. Given  
421 the genetic instability challenges with the CAR/ADO system (see Section 3.3) we shifted our  
422 constructs to the more tightly repressed Pcoa promoter (Peca et al., 2008) for controlling the  
423 expression of *E. coli* TesA and the *Chlorella variabilis* FAP from the RSF1010 plasmid (Fig. 6A).  
424 We noted that the yield of FFA was substantially increased when driving the expression of  
425 TesA with the Pcoa promoter (Fig. 6C) compared to Pclac143 (Fig. 4D).

426           Despite the dominance of C16:0 fatty acids released by 'TesA in *Synechocystis* 6803,  
427 alongside minor fractions of C14:0 and C18:0, the C17:0 alkanes dominated the hydrocarbon  
428 fraction at the lower light intensity (100  $\mu$ E) (Fig. 6B and 6D). This alkane profile in  
429 *Synechocystis* 6803 is very different to that observed in *E. coli* without over-expression of  
430 'TesA (see Fig. S4 in (Sorigué et al., 2017)). We also observed substantial peaks of 8-  
431 heptadecene and 6,9-heptadecadiene, as suggested by comparison with a NIST mass  
432 spectrometry library, although a lack of standards prohibited confirmation (Supplementary  
433 Figure 8). Curiously, these alkenes were only detected at day 6 and were not present in  
434 samples harvested on day 10. As the fatty chain-length profiles differ when the same  
435 thioesterase is expressed in different *E. coli* strains (Akhtar et al., 2015; Jing et al., 2011), this  
436 suggests that the *in vivo* product profile of any thioesterase-dependent pathway also is  
437 dependent on what the fatty acid synthesis pathway provides, not just the substrate  
438 specificity of the thioesterase used.

439           Removal of the predicted chloroplast targeting sequence of FAP ('FAP) resulted in a  
440 doubling of the alkane yield, this time accompanied also by C15 pentadecane. As the FAP  
441 reaction is light-dependent, we also did a simple evaluation of this environmental factor.  
442 When the light intensity was tripled, the total alkane production with the  $\Delta$ aas-1010-'TesA-  
443 'FAP strain increased to a yield of 77.1 mg/g CDW (19-fold enhancement relative to  $\Delta$ aas) and  
444 a titer of 111.2 mg/L. The product profile also shifted (Fig. 6D) despite the lack of a similar  
445 shift in the remaining FFA fraction (Fig. 6B), suggesting that the substrate specificity of FAP is  
446 flexible and interestingly might change in response to a change in its cellular environment.

447           At 100  $\mu$ E the introduction of 'FAP resulted in a drop in FFA accumulation of up to 90%  
448 (for C18:0), whilst for C16:0 there was only a 60% reduction (Fig. 6C). Despite repeated  
449 trials, the recovery in the measurable fatty acid to alkane conversion remained poor for C16:0

450 in comparison to C18:0 and the other pathways tested in *Synechocystis* 6803. This may be  
451 explained by an impact on 'TesA accumulation in the constructs also carrying the gene coding  
452 for 'FAP. Nevertheless, the reconstituted eukaryotic algae alkane pathway was more  
453 responsive to introduced modifications in the prokaryotic cyanobacterium than in its native  
454 host, though this most likely is explained by challenges associated with the release of FFA in  
455 the latter.

456         Although a substantial amount of both alkanes and alkenes were produced by the  
457 engineered strains, their performance likely needs to be improved before any application can  
458 be considered. Given that no genetically engineered phototrophic microalgae is currently used  
459 for commercial purposes (as far as we are aware), and LCA-studies with non-catalytic systems  
460 indicate a low predicted energy return on investment (EROI) (Carneiro et al., 2017), also  
461 other challenges with commercial algal biotechnology (e.g. contamination, bioreactor cost,  
462 energy consumption, etc) will need to be addressed.

463



464 **CONCLUSIONS**

465 The different biosynthetic systems presented in this study varied in terms of cellular context,  
466 compartmentation, promoters, operon structures and expression platforms, thus precluding a  
467 any direct comparison within and between the two species studied. However, the relative  
468 conversion efficiencies and absolute functionalities provide for a valid comparison. As such, it  
469 could be seen that the conversion of free fatty acids into alkenes by UndB and alkanes by FAP  
470 were effective (>50% conversion, for individual fatty acids up to >90% conversion), and that  
471 the native FAP pathway in *Chlamydomonas* was amenable to manipulation but that the  
472 inability to increase the FFA pool hindered further progress. Consequently, for alkanes, the  
473 reconstruction of the eukaryotic algae pathway in the prokaryotic cyanobacteria host  
474 provided a more productive system than the partially synthetic pathways in either of the  
475 prokaryotic (CAR-ADO) or eukaryotic hosts (TesA-FAP).

476 This work describes several approaches to employ synthetic metabolism and  
477 substantially exceed native capabilities for hydrocarbon biosynthesis in well-established model  
478 cyanobacteria and algae. Although even greater yields have been reported in oleaginous algae  
479 and cyanobacteria that are natively endowed to accumulate lipids, the ability to introduce  
480 synthetic metabolic pathways in model strains opens up possibilities for tailored choice of  
481 both products and hosts. Importantly, the present work is based on first generation strains  
482 and further improvement is likely with systematic optimization of both strains and cultivation  
483 conditions, including the use of superior engineered or natural enzyme variants.

484

485

486 **ACKNOWLEDGEMENTS**

487 This project has received funding from the European Union's Horizon 2020 research and  
488 innovation programme project PHOTOFUEL under grant agreement No 640720. IY received a  
489 PhD scholarship from Indonesia Endowment Fund for Education (LPDP). The authors would  
490 also like to thank Dr. Daniel Jaeger for assistance with lipid extraction from *C. reinhardtii*.

491

492

493

494 **FIGURE LEGENDS**

495

496 **Figure 1. Native and synthetic metabolic pathways evaluated in the present study with**  
497 **incomplete stoichiometry.** The graphic illustration shows the introduced TesA (thioesterase  
498 (Cho and Cronan, 1995)), CAR (carboxylic acid reductase (Akhtar et al., 2013)), UndA  
499 (responsible for 1-undecene biosynthesis in *Pseudomonas* (Rui et al., 2014)), UndB (also  
500 responsible for 1-undecene biosynthesis in *Pseudomonas* (Rui et al., 2015)), OleT (responsible  
501 for olefin biosynthesis in *Jeotgalicoccus* (Rude et al., 2011)) and FAP (fatty acid  
502 photodecarboxylase (Sorigué et al., 2017)) enzymes alongside the native AAR/ADO (acyl-ACP  
503 reductase and aldehyde deformylating oxygenase (Schirmer et al., 2010)), AHR (aldehyde  
504 reductase, unknown) and FAP enzymes. Blue reactions are non-native and those in grey are  
505 native. The red cross indicates deletion of the *aas* gene.

506

507 **Figure 2. Engineering for enhanced accumulation of free fatty acids.** (A) Representative  
508 total ion count chromatograms for *Synechocystis* 6803 strains  $\Delta aas$ -*TesA* (black) vs.  $\Delta aas$  only  
509 (orange) extracted on day 10 of cultivation (induced day 2). Peak identities: (3) Heptadecane,  
510 (4) Tetradecanoic acid, (5) Hexadecanoic acid, (6) 9,12-octadecadienoic acid, (7) 9-  
511 octadecenoic acid, (8) Octadecanoic acid. (B) Graphic representation of the constructs used to  
512 transform *Chlamydomonas*. CTP = Chloroplast Transit Peptide. (C) Fluorescence microscopy  
513 of representative strains indicating appropriate chloroplast localization of the CTP\_'*TesA*\_YFP  
514 construct. (D) Total (TL), polar (PL), and neutral (NL) gravimetric lipid fractions of  
515 *Chlamydomonas* parental strain and *TesA* overproducing strains under nutrient replete  
516 conditions (N+) and after 96 hours of nitrogen depletion (N-). PL is significantly greater in +N  
517 for *TesA*: ttest, p:0.047 (indicated by an asterisk).

518

519 **Figure 3. Over-expression of UndB results in effective (>50%) conversion of fatty acids**  
520 **into corresponding alkenes.** (A) Graphic representation of the genetic modification of  
521 *Synechocystis* sp. PCC 6803 and the plasmid used for UndB expression. (B) GC-MS  
522 chromatograms with extracts from the two different strains (w/wo UndB);  $\Delta aas$ -1010-'*TesA*  
523 (black) and  $\Delta aas$ -1010-'*TesA*-UndB (orange). (C) The free fatty acid yield (relative to biomass)  
524 in the whole cultures of the two strains, subdivided into the three dominant chain-lengths. (D)  
525 The yield of alkenes in the whole cultures of the two strains, subdivided into the three  
526 dominant chain-lengths. (E) The localization of the alkene products in whole cultures of the  
527 two strains. Peak identities: (1) 1-pentadecene, (2) 1-heptadecene, (3) heptadecane, (4)

528 tetradecanoic acid, (5) hexadecanoic acid, (6) 9,12-octadecadienoic acid, (7) 9-octadecenoic  
529 acid, (8) octadecanoic acid. Data are mean  $\pm$  SD from three biological replicates. All samples  
530 were extracted on day 10.

531

532 **Figure 4. The CAR-dependent pathway produces mainly fatty alcohols.** (A) Graphic  
533 overview (not to scale) illustrating the main constructs studied in the figure. (B) Total ion  
534 chromatogram from extracts of  $\Delta aas-1010$ -*TesA* (black) and  $\Delta aas-1010$ -TPC2 (orange). (C)  
535 Fatty alcohol profile from extracts of  $\Delta aas$ -TPC2. The yield of fatty acids (D), alcohols (E) and  
536 alkanes (F). Peak identities: (2) 1-dodecanol, (3) heptadecane, (4) 1-tetradecanol, (5) 1-  
537 hexadecanol, (6) 9,12-octadecadien-1-ol, (7) 9-octadecen-1-ol, (8) 1-octadecanol, (9)  
538 dodecanoic acid, (10) tetradecanoic acid, (11) hexadecanoic acid, (12) octadecanoic acid. Data  
539 are mean  $\pm$  SD of three biological replicates. Cultures were induced on day 2 following  
540 dilution and samples were extracted on day 10.

541

542 **Figure 5. CrFAP over-expression increases 7-heptadecene yield, but heterologous**  
543 **thioesterase (*TesA*) expression, its co-expression, and C- or N-terminal fusion with**  
544 **CrFAP has no benefit.** Mutants expressing indicated constructs (left panel) were cultivated  
545 for seven days in TAP medium with 250  $\mu\text{mol photons s}^{-1} \text{m}^{-2}$  constant illumination and cell  
546 pellets were extracted with cell rupture by glass beads and dodecane for yield quantification  
547 of 7-heptadecene via GC-MS (bar graph, right). All constructs bear a PsaD chloroplast  
548 targeting peptide (CTP) to allow protein transit to the chloroplast. Arrows and plus sign  
549 indicate co-expression in double transformed mutants. Error bars represent 95% confidence  
550 intervals of single strains cultivated in biological triplicates.

551

552 **Figure 6. Conversion of free fatty acids into alkanes in cyanobacteria using FAP.** (A)  
553 Graphic representative of the plasmids used to transform *Synechocystis* sp. PCC 6803. (B)  
554 Total ion chromatogram from  $\Delta aas$ -Pcoa-*TesA* (left) and  $\Delta aas-1010$ -Pcoa-*TesA*-FAP (100  
555 mE, middle; 300 mE, right). The free fatty acid (C) and alkane (D) yield in all tested strains.  
556 Data are mean  $\pm$  SD of three biological replicates. Samples were extracted on day 10. Peak: (1)  
557 heptadecane, (2) octadecane (internal standard), (3) pentadecane, (4) undecane, (5)  
558 tridecane, (6) hexadecanoic acid.

559

560

561

562 **REFERENCES**

- 563 Ajjawi, I., Verruto, J., Aqui, M., Soriaga, L. B., Coppersmith, J., Kwok, K., Peach, L., Orchard, E.,  
564 Kalb, R., Xu, W., Carlson, T. J., Francis, K., Konigsfeld, K., Bartalis, J., Schultz, A., Lambert,  
565 W., Schwartz, A. S., Brown, R., Moellering, E. R., 2017. Lipid production in  
566 *Nannochloropsis gaditana* is doubled by decreasing expression of a single  
567 transcriptional regulator. *Nat Biotechnol.* 35, 647-652.
- 568 Akhtar, M. K., Dandapani, H., Thiel, K., Jones, P. R., 2015. Microbial production of 1-octanol - a  
569 naturally excreted biofuel with diesel-like properties. *Metabolic Engineering*  
570 *Communications.* 2, 1-5.
- 571 Akhtar, M. K., Turner, N. J., Jones, P. R., 2013. Carboxylic acid reductase is a versatile enzyme  
572 for the conversion of fatty acids into fuels and chemical commodities. *Proc Natl Acad*  
573 *Sci U S A.* 110, 87-92.
- 574 Angermayr, S. A., van der Woude, A. D., Correddu, D., Vreugdenhil, A., Verrone, V., Hellingwerf,  
575 K. J., 2014. Exploring metabolic engineering design principles for the photosynthetic  
576 production of lactic acid by *Synechocystis* sp. PCC6803. *Biotechnol Biofuels.* 7, 99.
- 577 Baier, T., Wichmann, J., Kruse, O., Lauersen, K. J., 2018. Intron-containing algal transgenes  
578 mediate efficient recombinant gene expression in the green microalga *Chlamydomonas*  
579 *reinhardtii*. *Nucleic Acids Research.* gky532-gky532.
- 580 Bernard, A., Domergue, F., Pascal, S., Jetter, R., Renne, C., Faure, J. D., Haslam, R. P., Napier, J. A.,  
581 Lessire, R., Joubès, J., 2012. Reconstitution of Plant Alkane Biosynthesis in Yeast  
582 Demonstrates That *Arabidopsis* ECERIFERUM1 and ECERIFERUM3 Are Core  
583 Components of a Very-Long-Chain Alkane Synthesis Complex. *Plant Cell.* 24, 3106-18.
- 584 Carneiro, M. L. N. M., Pradelle, F., Braga, S. L., Gomes, M. S. P., Martins, A. R. F. A., Turkovics, F.,  
585 Pradelle, R. N. C., 2017. Potential of biofuels from algae: Comparison with fossil fuels,  
586 ethanol and biodiesel in Europe and Brazil through life cycle assessment (LCA).  
587 *Renewable and Sustainable Energy Reviews.* 73, 632-653.
- 588 Cho, H., Cronan, J. E., 1995. Defective export of a periplasmic enzyme disrupts regulation of  
589 fatty acid synthesis. *J Biol Chem.* 270, 4216-9.
- 590 Cook, C., Dayananda, C., Tennant Richard, K., Love, J., 2017. Third - Generation Biofuels from  
591 the Microalga, *Botryococcus braunii*. *Biofuels and Bioenergy.*
- 592 Delrue, F., Li-Beisson, Y., Setier, P. A., Sahut, C., Roubaud, A., Froment, A. K., Peltier, G., 2013.  
593 Comparison of various microalgae liquid biofuel production pathways based on  
594 energetic, economic and environmental criteria. *Bioresour Technol.* 136C, 205-212.

- 595 Elhai, J., Wolk, C. P., 1988. Conjugal transfer of DNA to cyanobacteria. *Methods Enzymol.* 167,  
596 747-54.
- 597 Eroglu, E., Melis, A., 2010. Extracellular terpenoid hydrocarbon extraction and quantitation  
598 from the green microalgae *Botryococcus braunii* var. *Showa*. *Bioresource Technology.*  
599 101, 2359-2366.
- 600 Eser, B. E., Das, D., Han, J., Jones, P. R., Marsh, E. N., 2011. Oxygen-independent alkane  
601 formation by non-heme iron-dependent cyanobacterial aldehyde decarbonylase:  
602 investigation of kinetics and requirement for an external electron donor. *Biochemistry.*  
603 50, 10743-50.
- 604 Gorman, D. S., Levine, R. P., 1965. Cytochrome f and plastocyanin: their sequence in the  
605 photosynthetic electron transport chain of *Chlamydomonas reinhardtii*. *Proc Natl Acad*  
606 *Sci U S A.* 54, 1665-9.
- 607 Hu, P., Borglin, S., Kamennaya, N. A., Chen, L., Park, H., Mahoney, L., Kijac, A., Shan, G.,  
608 Chavarría, K. L., Zhang, C., Quinn, N. W. T., Wemmer, D., Holman, H.-Y., Jansson, C., 2013.  
609 Metabolic phenotyping of the cyanobacterium *Synechocystis* 6803 engineered for  
610 production of alkanes and free fatty acids. *Applied Energy.* 102, 850-859.
- 611 Jing, F., Cantu, D. C., Tvaruzkova, J., Chipman, J. P., Nikolau, B. J., Yandeu-Nelson, M. D., Reilly,  
612 P. J., 2011. Phylogenetic and experimental characterization of an acyl-ACP thioesterase  
613 family reveals significant diversity in enzymatic specificity and activity. *BMC Biochem.*  
614 12, 44.
- 615 Kaczmarzyk, D., Cengic, I., Yao, L., Hudson, E.P., 2018. Diversion of the long-chain acyl- ACP  
616 pool in *Synechocystis* to fatty alcohols through CRISPRi repression of the es- sential  
617 phosphate acyltransferase *PlsX*. *Metab. Eng.* 45, 59-66.
- 618 Kageyama, H., Waditee-Sirisattha, R., Sirisattha, S., Tanaka, Y., Mahakhant, A., Takabe, T., 2015.  
619 Improved Alkane Production in Nitrogen-Fixing and Halotolerant Cyanobacteria via  
620 Abiotic Stresses and Genetic Manipulation of Alkane Synthetic Genes. *Curr Microbiol.*  
621 71, 115-20.
- 622 Kallio, P., Pasztor, A., Thiel, K., Akhtar, M. K., Jones, P. R., 2014. An engineered pathway for the  
623 biosynthesis of renewable propane. *Nature Communications.* 5:4731.
- 624 Kato, A., Takatani, N., Ikeda, K., Maeda, S.I., Omata, T., 2017. Removal of the product from the  
625 culture medium strongly enhances free fatty acid production by genetically  
626 engineered. *Biotechnol. Biofuels* 10, 141.

- 627 Khara, B., et al., 2013. Production of propane and other short-chain alkanes by structure-  
628 based engineering of ligand specificity in aldehyde-deformylating oxygenase.  
629 ChemBioChem 14, 1204–1208.
- 630 Kindle, K. L., 1990. High-frequency nuclear transformation of *Chlamydomonas reinhardtii*.  
631 Proc Natl Acad Sci U S A. 87, 1228-32.
- 632 Lauersen, K. J., Baier, T., Wichmann, J., Wördenweber, R., Mussgnug, J. H., Hübner, W., Huser,  
633 T., Kruse, O., 2016. Efficient phototrophic production of a high-value sesquiterpenoid  
634 from the eukaryotic microalga *Chlamydomonas reinhardtii*. Metab Eng. 38, 331-343.
- 635 Lauersen, K. J., Kruse, O., Mussgnug, J. H., 2015. Targeted expression of nuclear transgenes in  
636 *Chlamydomonas reinhardtii* with a versatile, modular vector toolkit. Appl Microbiol  
637 Biotechnol. 99, 3491-503.
- 638 Lauersen, K. J., Wichmann, J., Baier, T., Kampranis, S. C., Pateraki, I., Møller, B. L., Kruse, O.,  
639 2018. Phototrophic production of heterologous diterpenoids and a hydroxy-  
640 functionalized derivative from *Chlamydomonas reinhardtii*. Metabolic Engineering.
- 641 Lea-Smith, D. J., Biller, S. J., Davey, M. P., Cotton, C. A., Perez Sepulveda, B. M., Turchyn, A. V.,  
642 Scanlan, D. J., Smith, A. G., Chisholm, S. W., Howe, C. J., 2015. Contribution of  
643 cyanobacterial alkane production to the ocean hydrocarbon cycle. Proc Natl Acad Sci U  
644 S A. 112, 13591-6.
- 645 Lea-Smith, D. J., Ortiz-Suarez, M. L., Lenn, T., Nürnberg, D. J., Baers, L. L., Davey, M. P., Parolini,  
646 L., Huber, R. G., Cotton, C. A., Mastroianni, G., Bombelli, P., Ungerer, P., Stevens, T. J.,  
647 Smith, A. G., Bond, P. J., Mullineaux, C. W., Howe, C. J., 2016. Hydrocarbons Are Essential  
648 for Optimal Cell Size, Division, and Growth of Cyanobacteria. Plant Physiol. 172, 1928-  
649 1940.
- 650 Lin, F., Das, D., Lin, X. N., Marsh, E. N., 2013. Aldehyde-forming fatty acyl-CoA reductase from  
651 cyanobacteria: expression, purification and characterization of the recombinant  
652 enzyme. FEBS J. 280, 4773-81.
- 653 Liu, X., Sheng, J., Curtiss, R., 2011. Fatty acid production in genetically modified cya-  
654 nobacteria. Proc. Natl. Acad. Sci. USA 108, 6899–6904.
- 655 Liu, Y., Wang, C., Yan, J., Zhang, W., Guan, W., Lu, X., Li, S., 2014. Hydrogen peroxide-  
656 independent production of  $\alpha$ -alkenes by OleTJE P450 fatty acid decarboxylase.  
657 Biotechnol Biofuels. 7, 28.
- 658 Markley, A.L., Begemann, M.B., Clarke, R.E., Gordon, G.C., Pflieger, B.F, 2015. . A syn- thetic  
659 biology toolbox for controlling gene expression in the cyanobacterium *Synechococcus*  
660 sp. PCC 7002. ACS Synth. Biol. 4, 595–603.

- 661 Metzger, P., Largeau, C., 2005. Botryococcus braunii: a rich source for hydrocarbons and  
662 related ether lipids. Appl Microbiol Biotechnol. 66, 486-96.
- 663 Neupert, J., Karcher, D., Bock, R., 2009. Generation of Chlamydomonas strains that efficiently  
664 express nuclear transgenes. Plant J. 57, 1140-50.
- 665 Peca, L., Kós, P. B., Máté, Z., Farsang, A., Vass, I., 2008. Construction of bioluminescent  
666 cyanobacterial reporter strains for detection of nickel, cobalt and zinc. FEMS Microbiol  
667 Lett. 289, 258-64.
- 668 Peramuna, A., Morton, R., Summers, M. L., 2015. Enhancing alkane production in  
669 cyanobacterial lipid droplets: a model platform for industrially relevant compound  
670 production. Life (Basel). 5, 1111-26.
- 671 Qiu, Y., Tittiger, C., Wicker-Thomas, C., Le Goff, G., Young, S., Wajnberg, E., Fricaux, T., Taquet,  
672 N., Blomquist, G. J., Feyereisen, R., 2012. An insect-specific P450 oxidative  
673 decarboxylase for cuticular hydrocarbon biosynthesis. Proc Natl Acad Sci U S A.
- 674 Quinn, J. C., Davis, R., 2015. The potentials and challenges of algae based biofuels: a review of  
675 the techno-economic, life cycle, and resource assessment modeling. Bioresour Technol.  
676 184, 444-452.
- 677 Rasala, B. A., Barrera, D. J., Ng, J., Plucinak, T. M., Rosenberg, J. N., Weeks, D. P., Oyler, G. A.,  
678 Peterson, T. C., Haerizadeh, F., Mayfield, S. P., 2013. Expanding the spectral palette of  
679 fluorescent proteins for the green microalga Chlamydomonas reinhardtii. Plant J. 74,  
680 545-56.
- 681 Rude, M. A., Baron, T. S., Brubaker, S., Alibhai, M., Del Cardayre, S. B., Schirmer, A., 2011.  
682 Terminal olefin (1-alkene) biosynthesis by a novel p450 fatty acid decarboxylase from  
683 Jeotgalicoccus species. Appl Environ Microbiol. 77, 1718-27.
- 684 Ruffing, A.M., 2014. Improved free fatty acid production in cyanobacteria with Synechococcus  
685 sp. PCC 7002 as host. Front. Bioeng. Biotechnol. 2, 17.
- 686 Rui, Z., Harris, N. C., Zhu, X., Huang, W., Zhang, W., 2015. Discovery of a Family of Desaturase-  
687 Like Enzymes for 1-Alkene Biosynthesis. ACS Catalysis. 5, 7091-7094.
- 688 Rui, Z., Li, X., Zhu, X., Liu, J., Domigan, B., Barr, I., Cate, J. H., Zhang, W., 2014. Microbial  
689 biosynthesis of medium-chain 1-alkenes by a nonheme iron oxidase. Proc Natl Acad Sci  
690 U S A. 111, 18237-42.
- 691 Schirmer, A., Rude, M., Li, X., Popova, E., del Cardayre, S., 2010. Microbial biosynthesis of  
692 alkanes. Science. 329, 559-62.
- 693 Sheppard, M. J., Kunjapur, A. M., Prather, K. L. J., 2016. Modular and selective biosynthesis of  
694 gasoline-range alkanes. Metab Eng. 33, 28-40.

- 695 Sorigué, D., Légeret, B., Cuiné, S., Blangy, S., Moulin, S., Billon, E., Richaud, P., Brugière, S.,  
696 Couté, Y., Nurizzo, D., Müller, P., Brettel, K., Pignol, D., Arnoux, P., Li-Beisson, Y., Peltier,  
697 G., Beisson, F., 2017. An algal photoenzyme converts fatty acids to hydrocarbons.  
698 Science. 357, 903-907.
- 699 Storch, M., Casini, A., Mackrow, B., Fleming, T., Trewitt, H., Ellis, T., Baldwin, G. S., 2015.  
700 BASIC: A New Biopart Assembly Standard for Idempotent Cloning Provides Accurate,  
701 Single-Tier DNA Assembly for Synthetic Biology. ACS Synth Biol. 4, 781-7.
- 702 Wang, W., Liu, X., Lu, X., 2013. Engineering cyanobacteria to improve photosynthetic  
703 production of alka(e)nes. Biotechnol Biofuels. 6, 69.
- 704 Warui, D. M., Pandelia, M. E., Rajakovich, L. J., Krebs, C., Bollinger, J. M., Booker, S. J., 2015.  
705 Efficient delivery of long-chain fatty aldehydes from the Nostoc punctiforme acyl-acyl  
706 carrier protein reductase to its cognate aldehyde-deformylating oxygenase.  
707 Biochemistry. 54, 1006-15.
- 708 Wichmann, J., Baier, T., Wentnagel, E., Lauersen, K. J., Kruse, O., 2018. Tailored carbon  
709 partitioning for phototrophic production of (E)- $\alpha$ -bisabolene from the green microalga  
710 Chlamydomonas reinhardtii. Metab Eng. 45, 211-222.
- 711 Work, V.H., Melnicki, M.R., Hill, E.A., Davies, F.K., Kucek, L.A., Beliaev, A.S., et al., 2015. Lauric  
712 acid production in a glycogen-less strain of Synechococcus sp. PCC 7002. Front Bioeng.  
713 Biotechnol. 3.
- 714 Yunus, I.Y., Jones, P.R., 2018. Photosynthesis-dependent biosynthesis of medium chain-length  
715 fatty acids and alcohols. Metab Eng. 49, 59-68.
- 716 Zhou, Y. J., Hu, Y., Zhu, Z., Siewers, V., Nielsen, J., 2018. Engineering 1-Alkene Biosynthesis and  
717 Secretion by Dynamic Regulation in Yeast. ACS Synth Biol. 7, 584-590.
- 718 Zhu, Z., Zhou, Y. J., Kang, M. K., Krivoruchko, A., Buijs, N. A., Nielsen, J., 2017. Enabling the  
719 synthesis of medium chain alkanes and 1-alkenes in yeast. Metab Eng. 44, 81-88.
- 720



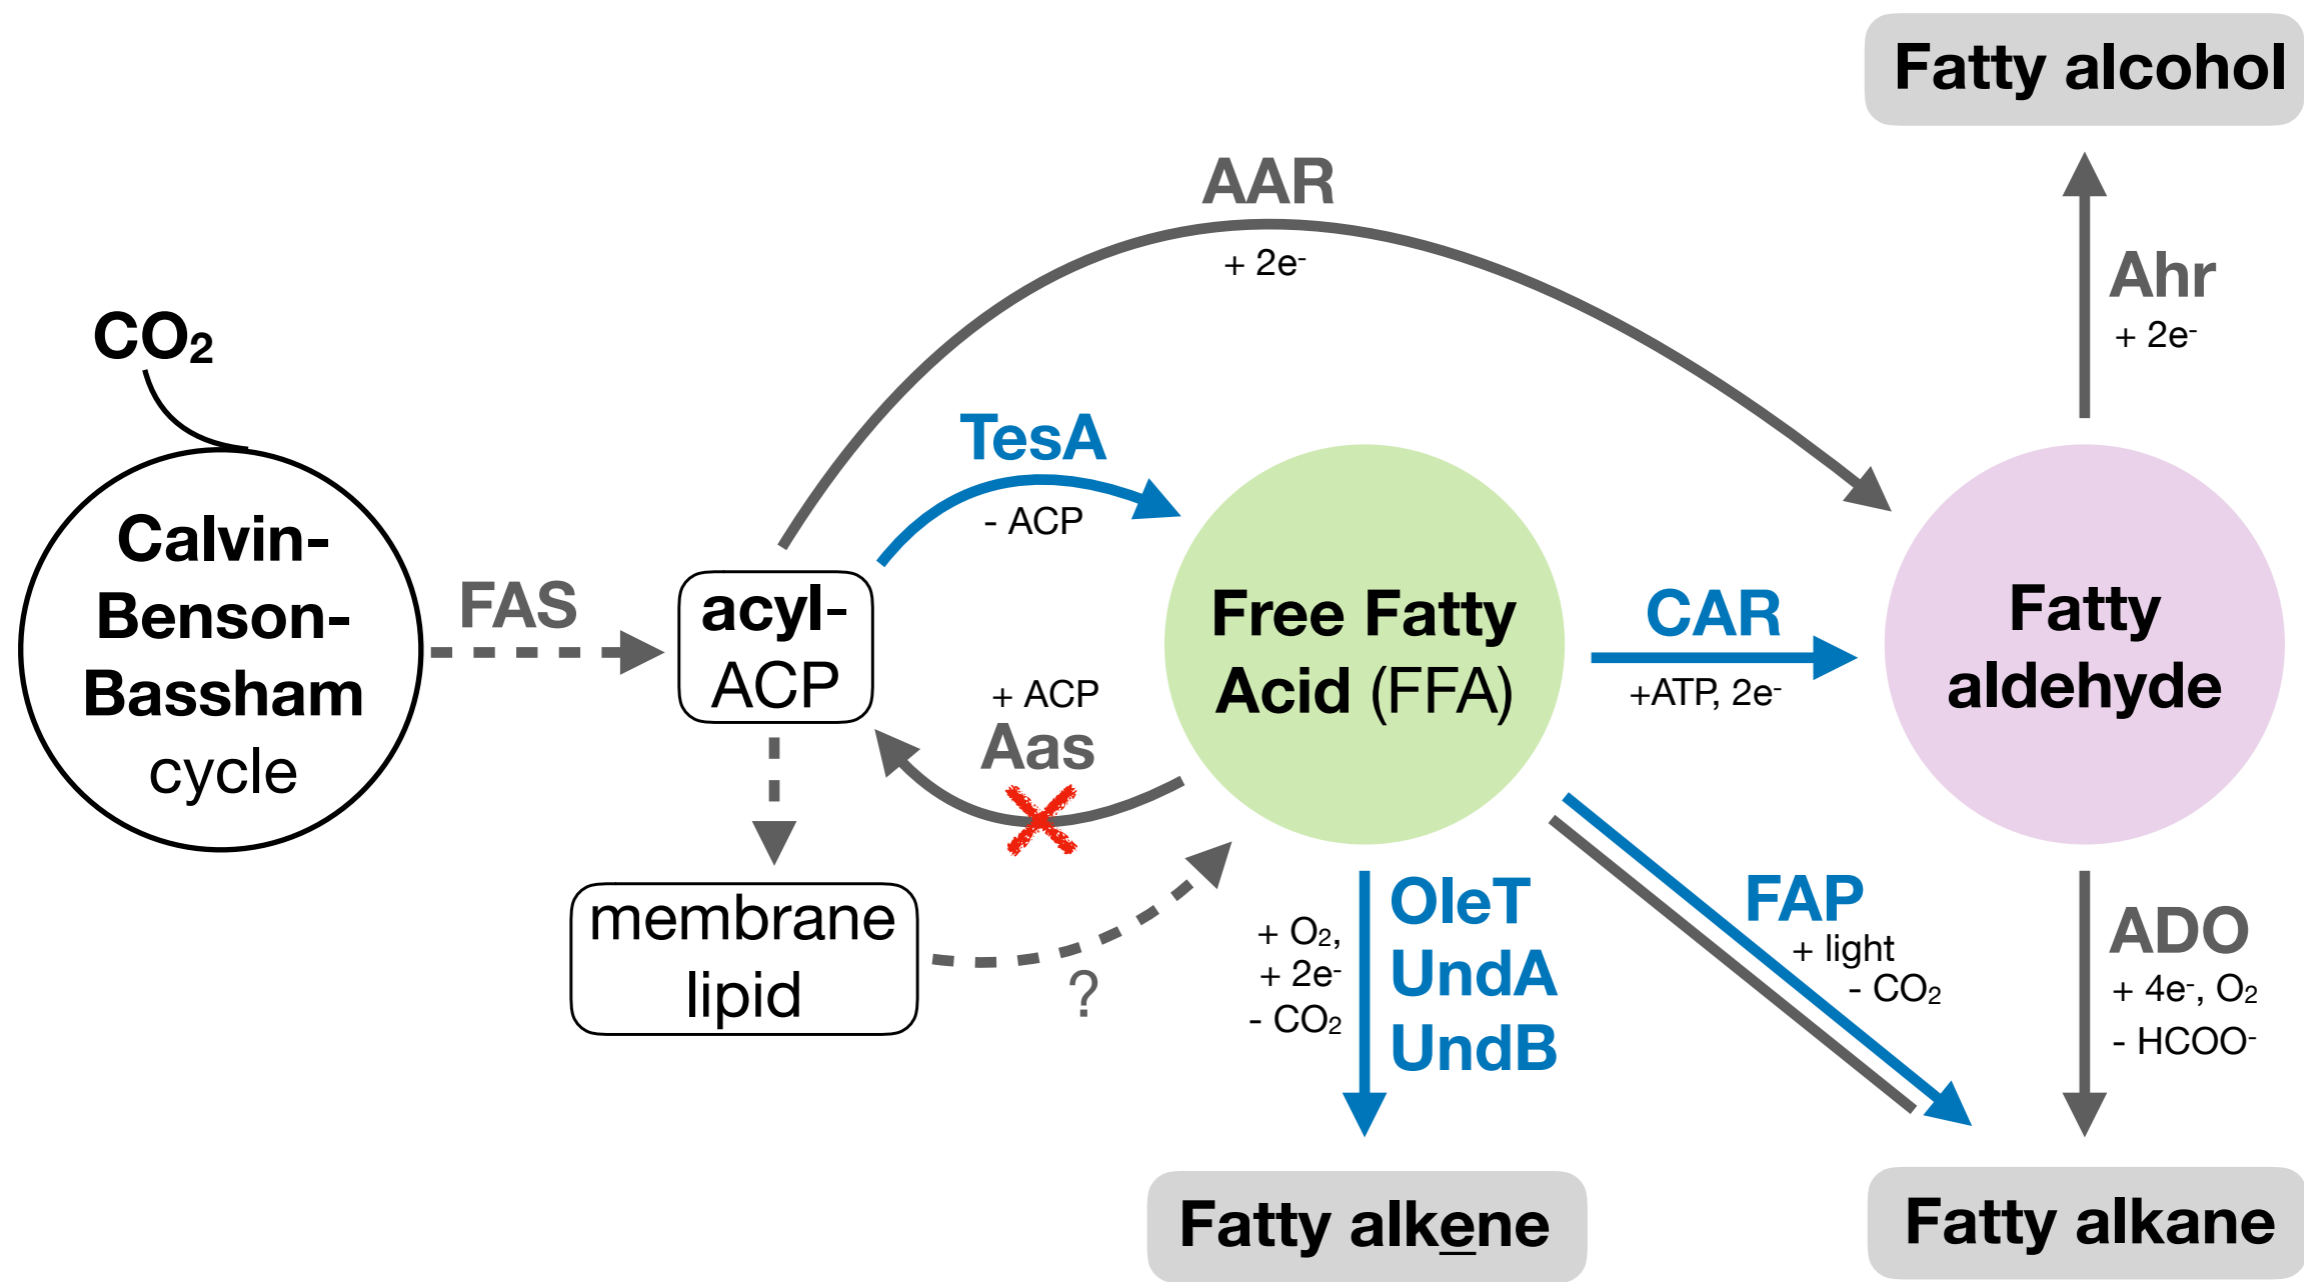

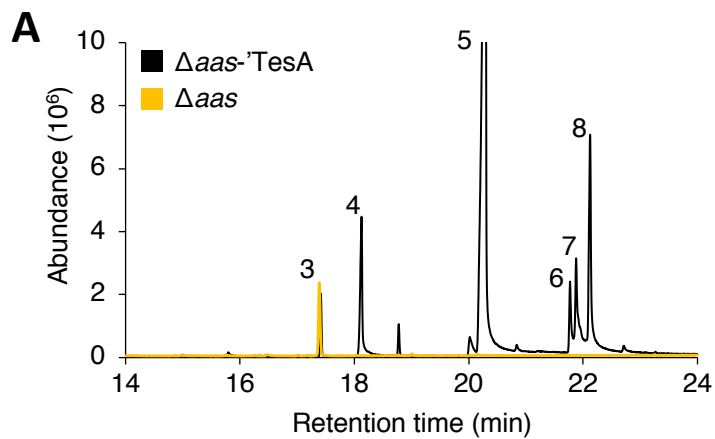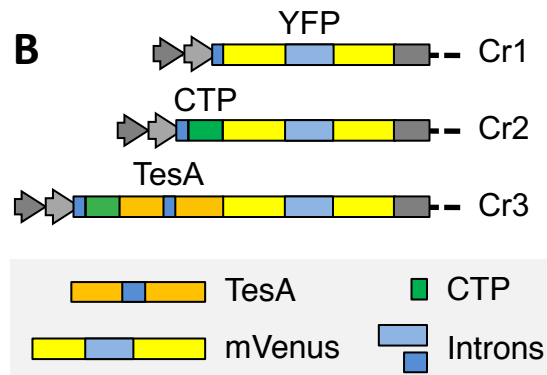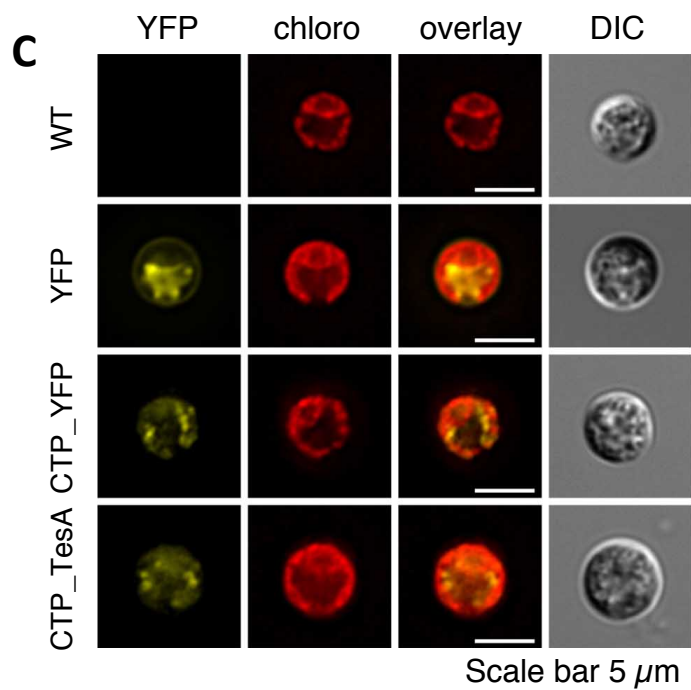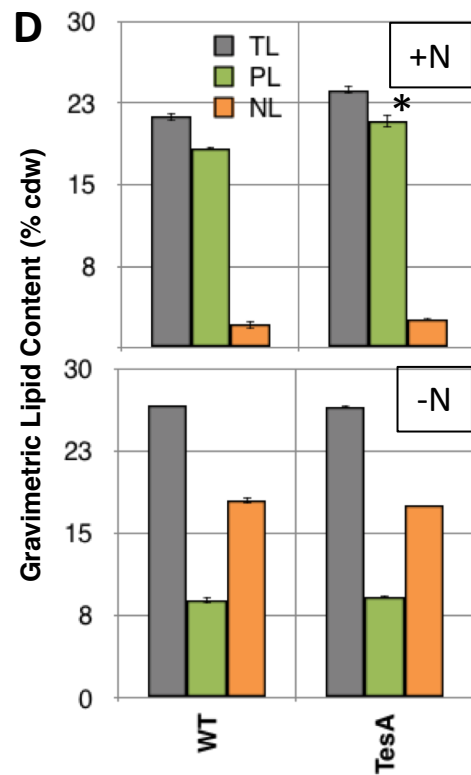

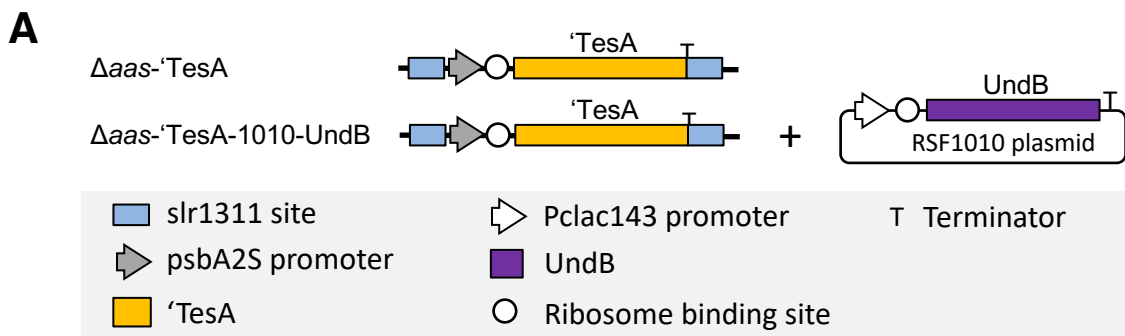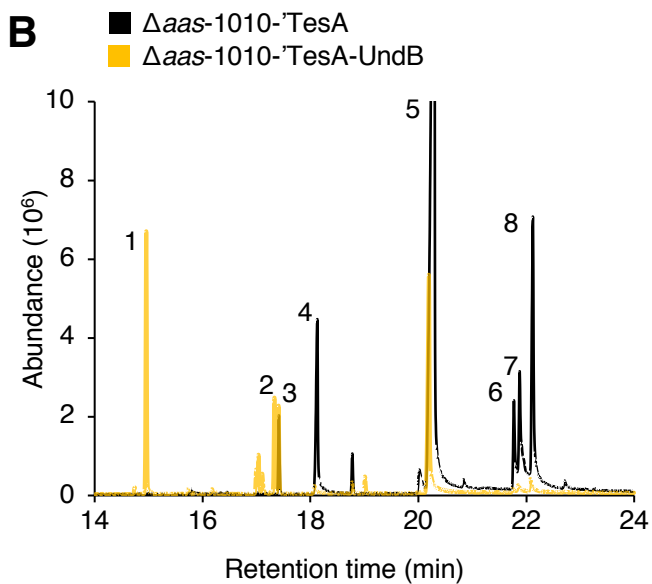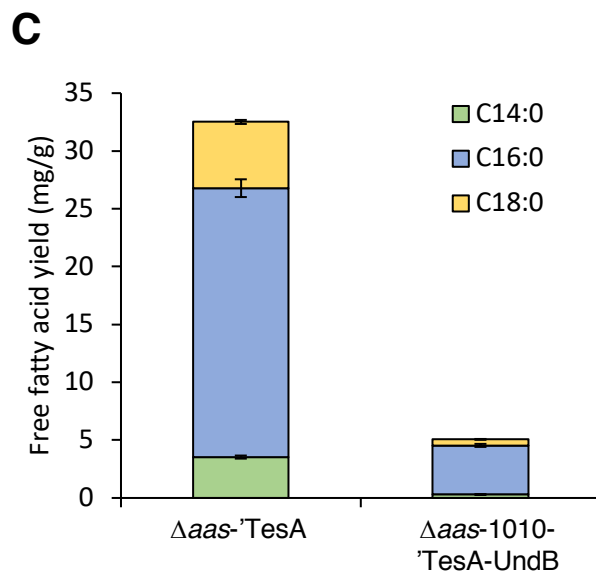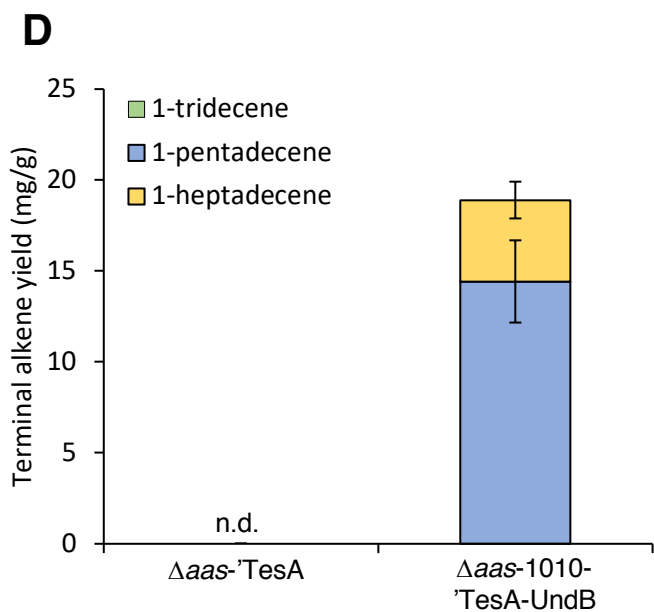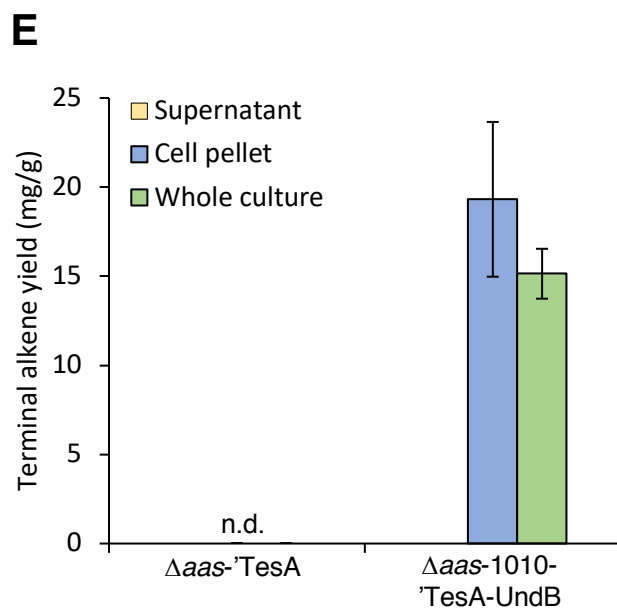

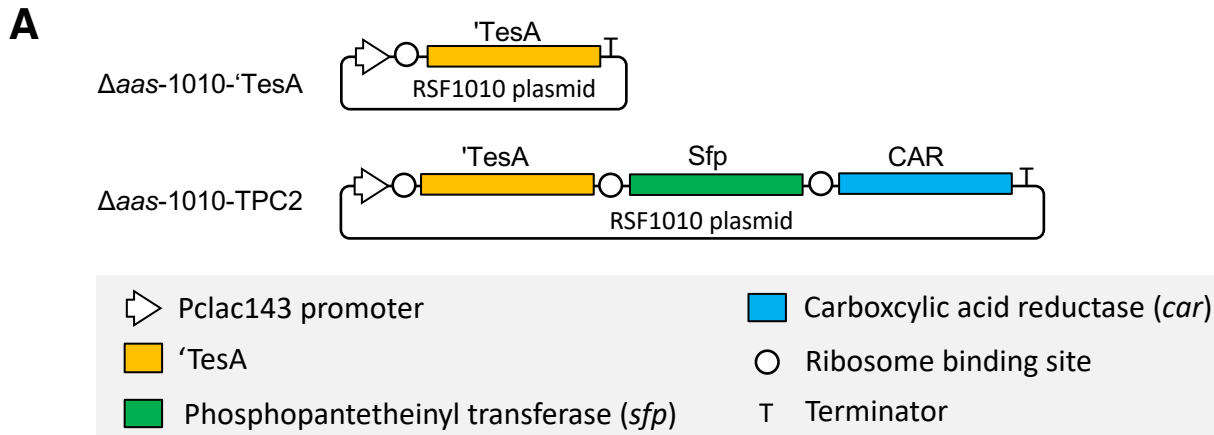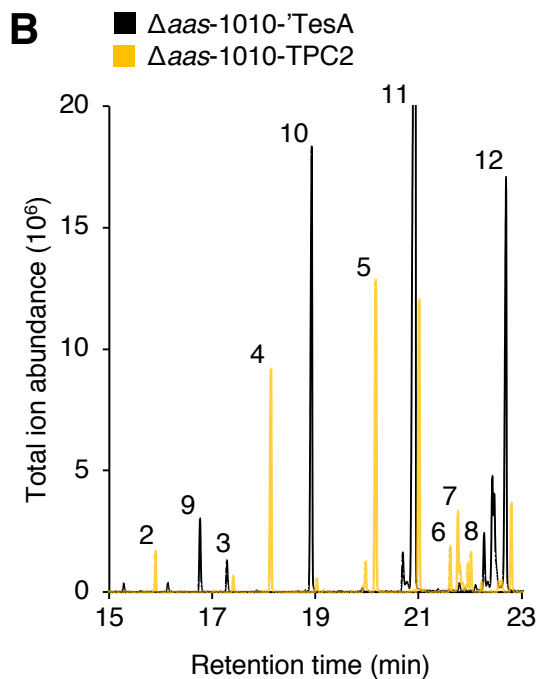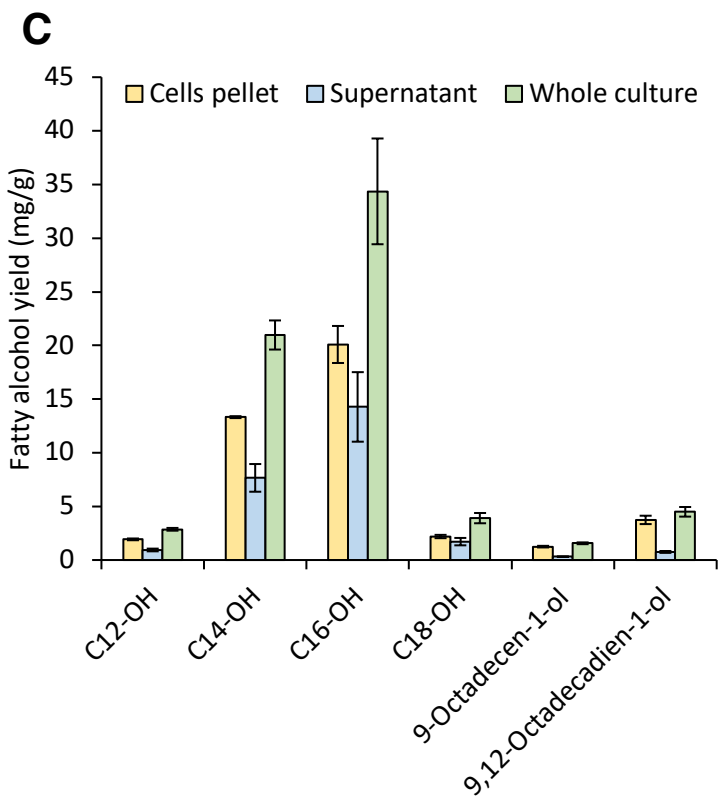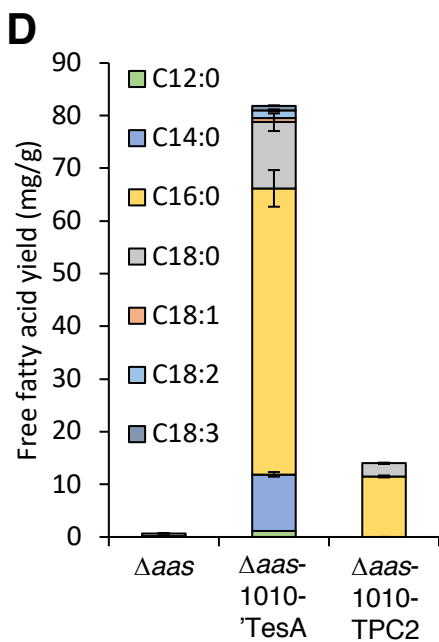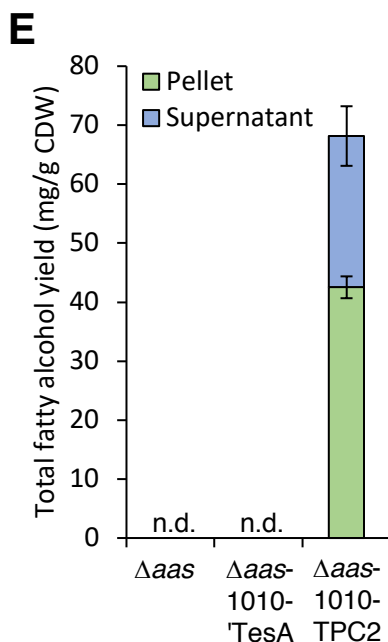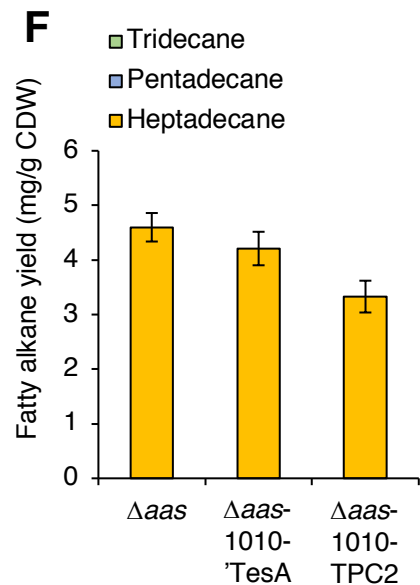

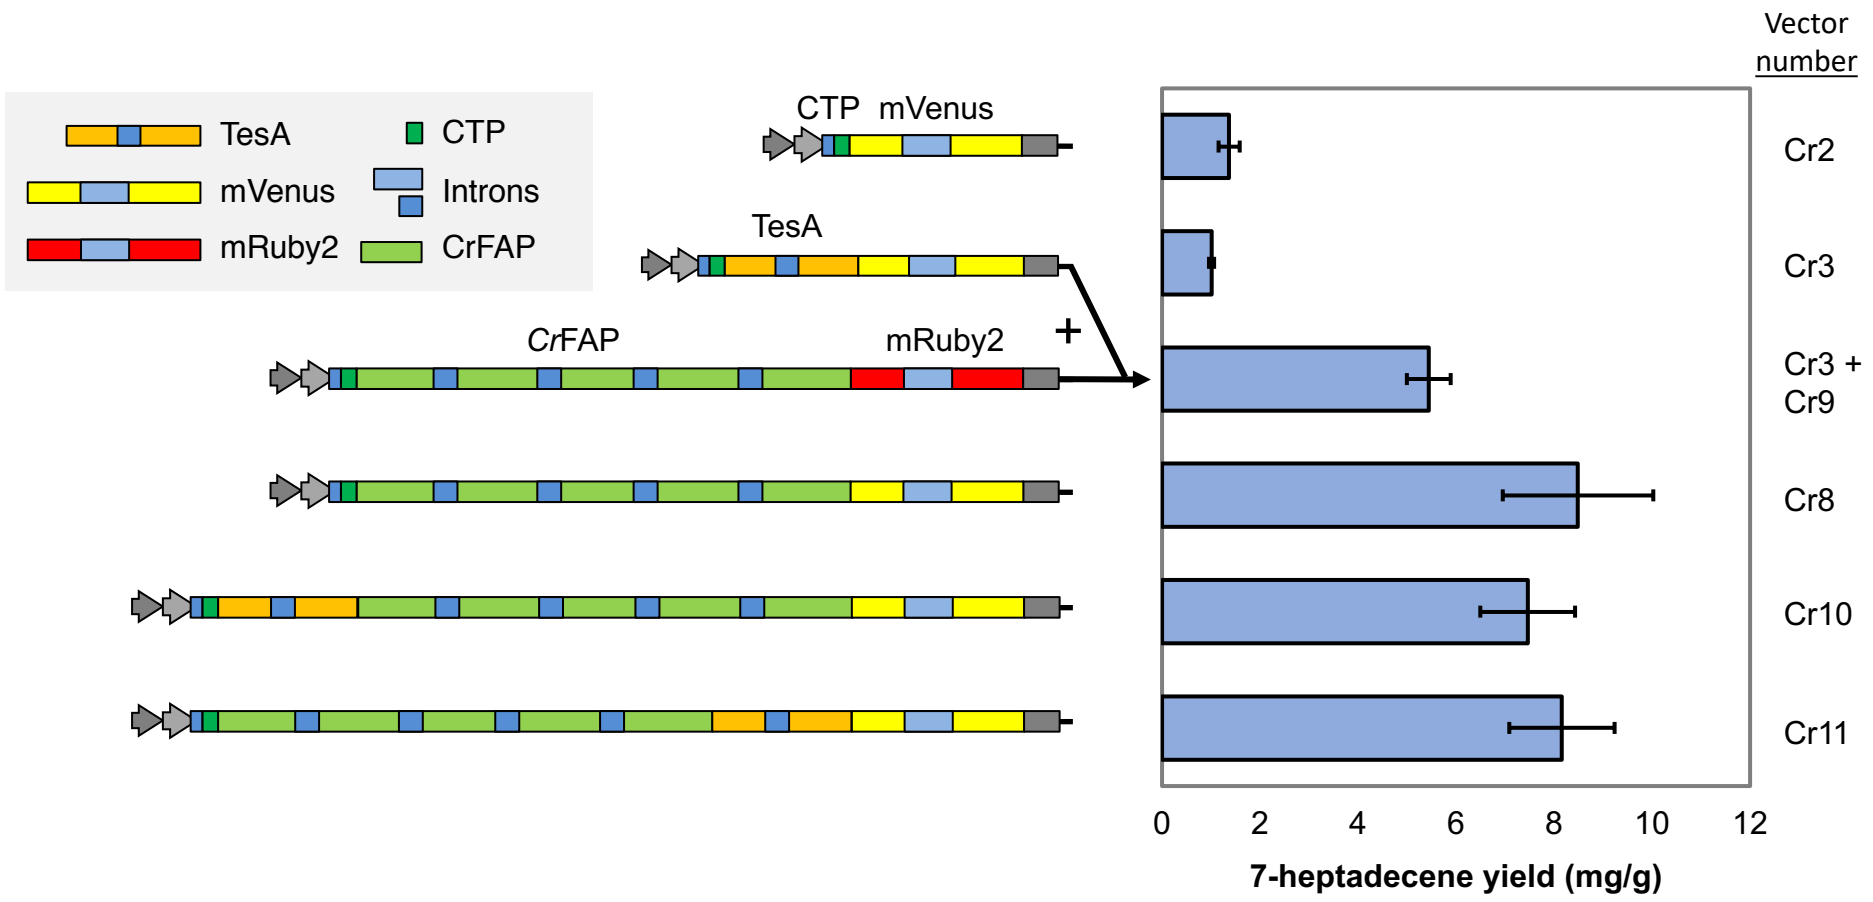

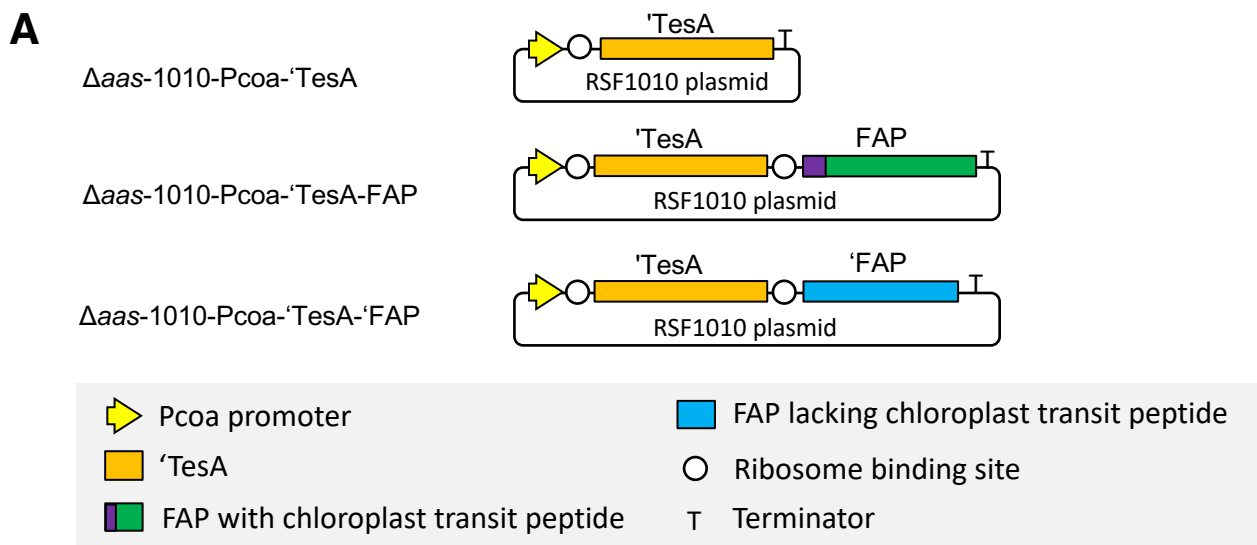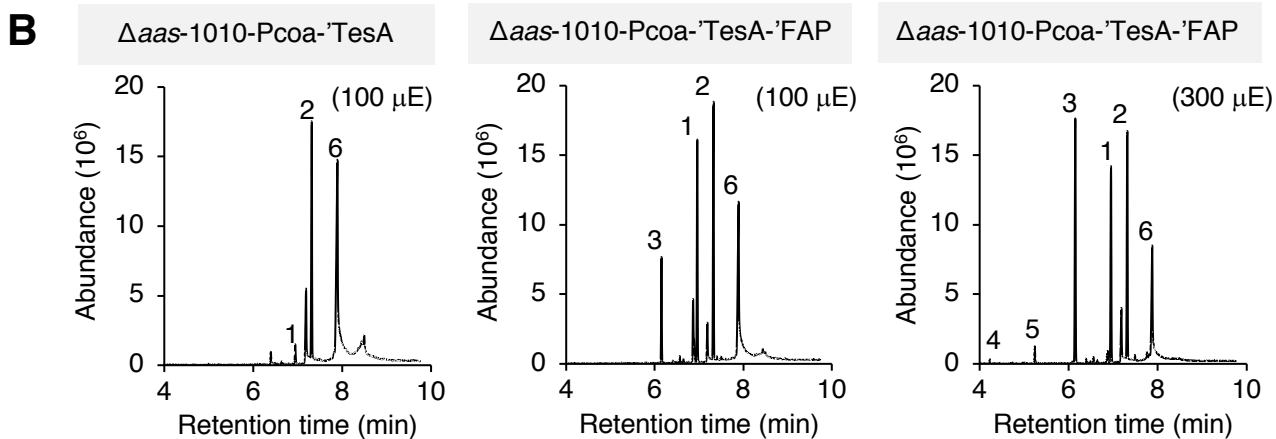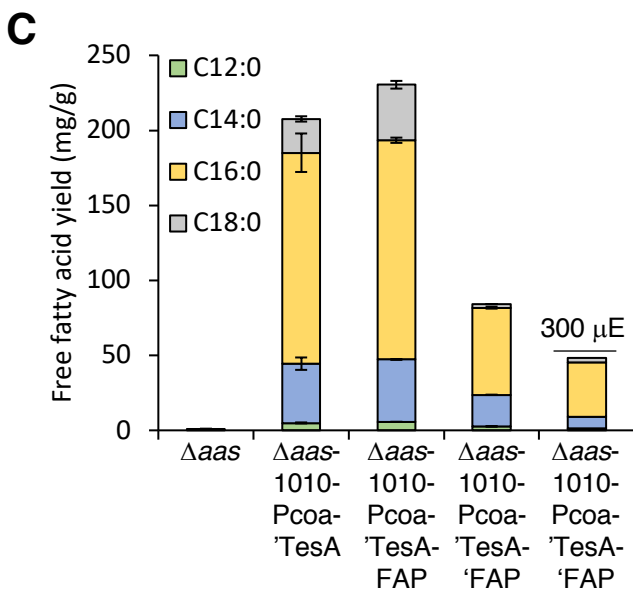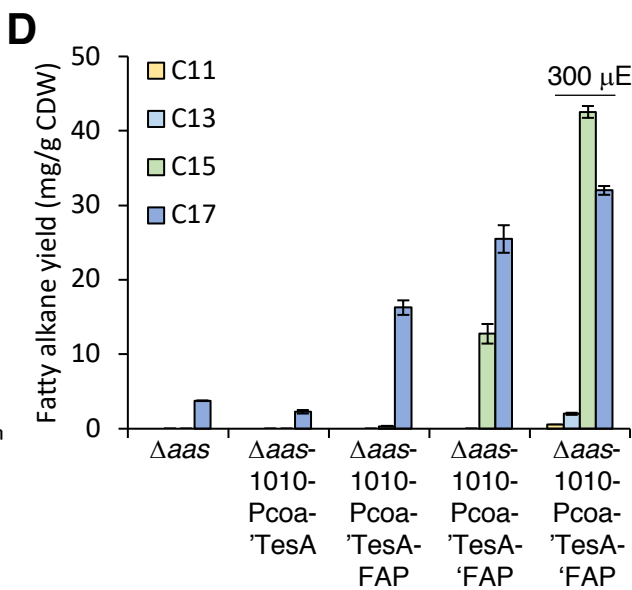

Source: http://biorxiv.org/content/10.1101/381913v1.full.pdf
